# Supplementary material
Source: PubMed Central journal article supplement (PMC4815587)
Supplement: hdy201455x1.pdf [file hdy201455x1.pdf]

1 **Supplementary Materials**

2 **Supplementary Material 1.** The distribution of allele frequency difference values obtained  
 3 from gene dropping method. The distribution is under pure drift.

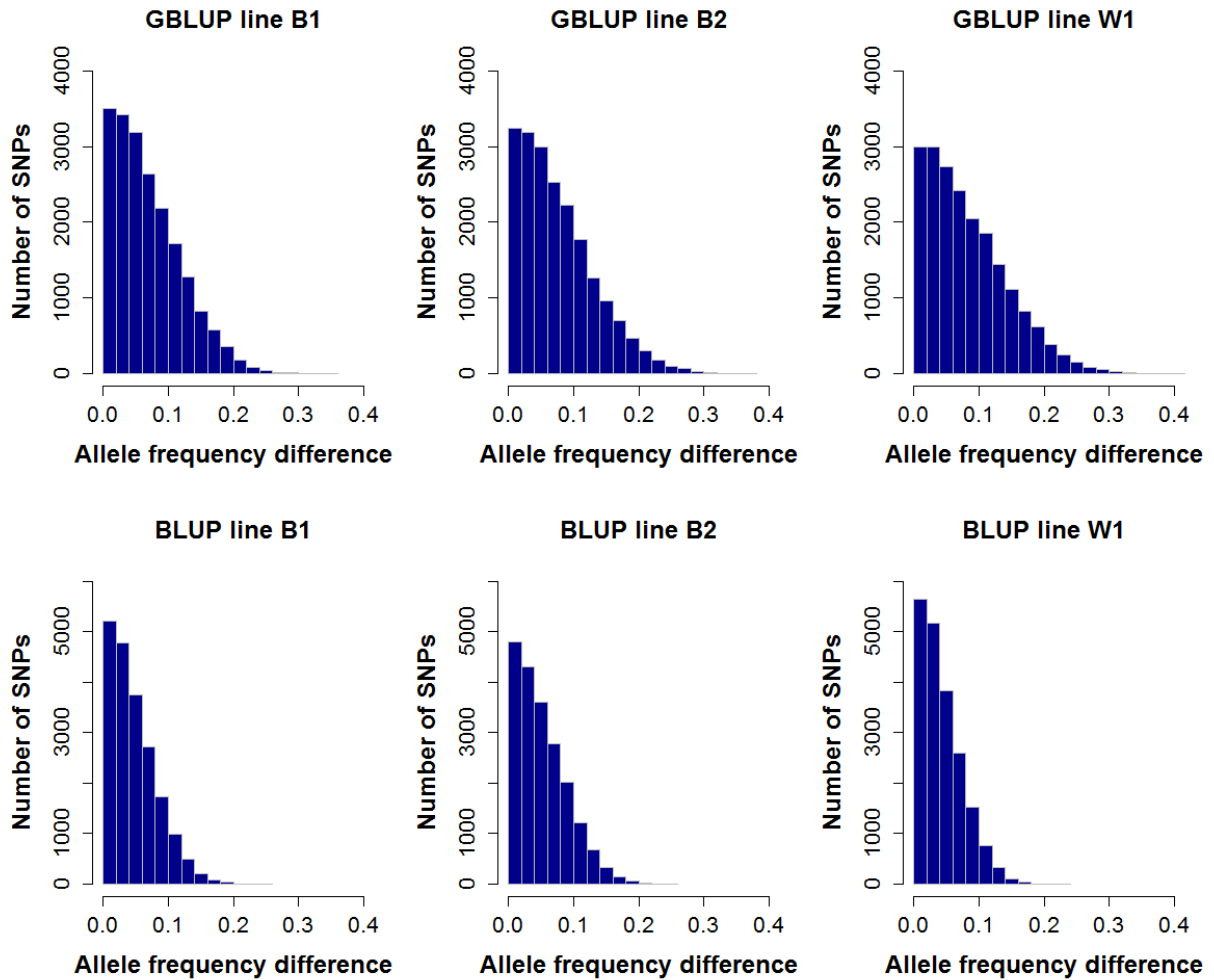

4  
 5  
 6  
 7

**Supplementary Material 2.** Chromosomal regions with evidence of selection and their size by GBLUP in Line B1.

| Number | Chr | Start Region (b) | End Region (b) | Size (Kb) | # SNPs within Window |
|--------|-----|------------------|----------------|-----------|----------------------|
| 1      | 1   | 4720681          | 4758257        | 38        | 2                    |
| 2      | 1   | 166584824        | 167901966      | 1317      | 13                   |
| 3      | 2   | 28920690         | 29217563       | 297       | 9                    |
| 4      | 2   | 45508551         | 46132452       | 624       | 20                   |
| 5      | 2   | 132208978        | 136448286      | 4239      | 23                   |
| 6      | 2   | 146308646        | 147213733      | 905       | 12                   |
| 7      | 2   | 154650591        | 154773773      | 123       | 3                    |
| 8      | 3   | 102824077        | 103300601      | 477       | 32                   |
| 9      | 4   | 16886356         | 17041365       | 155       | 5                    |
| 10     | 5   | 33373065         | 33943902       | 571       | 11                   |
| 11     | 6   | 28570859         | 28596240       | 25        | 2                    |
| 12     | 6   | 36668647         | 36694690       | 26        | 2                    |
| 13     | 8   | 15164327         | 15386078       | 222       | 6                    |
| 14     | 12  | 7691443          | 8072782        | 381       | 16                   |
| 15     | 12  | 16254872         | 16348587       | 94        | 5                    |
| 16     | 17  | 566109           | 576200         | 10        | 3                    |

|    |    |          |          |      |    |
|----|----|----------|----------|------|----|
| 17 | 18 | 588543   | 679660   | 91   | 6  |
| 18 | 20 | 9264214  | 9358727  | 95   | 10 |
| 19 | 21 | 4640996  | 4915810  | 275  | 5  |
| 20 | 27 | 1523159  | 1582373  | 59   | 7  |
| 21 | Z  | 43150739 | 43389428 | 239  | 8  |
| 22 | Z  | 45979603 | 46522178 | 543  | 14 |
| 23 | Z  | 49611037 | 49734015 | 123  | 4  |
| 24 | Z  | 55076530 | 56159359 | 1083 | 22 |

8 Abbreviations: Chr, chromosome; SNP, Single Nucleotide Polymorphism.

9

10 **Supplementary Material 3.** Chromosomal regions with evidence of selection and their size  
 11 by GBLUP in Line B2.

| Number | Chr | Start Region (b) | End Region (b) | Size (Kb) | # SNPs within Window |
|--------|-----|------------------|----------------|-----------|----------------------|
| 1      | 1   | 8401914          | 8781041        | 379       | 15                   |
| 2      | 1   | 95898565         | 96327303       | 429       | 9                    |
| 3      | 1   | 152635633        | 152738843      | 103       | 3                    |
| 4      | 2   | 118893774        | 119623629      | 730       | 24                   |
| 5      | 2   | 152274434        | 153504517      | 1230      | 16                   |
| 6      | 3   | 54888621         | 55308850       | 420       | 11                   |
| 7      | 4   | 21568436         | 22527061       | 959       | 29                   |
| 8      | 4   | 37930765         | 38125680       | 195       | 5                    |
| 9      | 5   | 19083517         | 19462239       | 379       | 2                    |
| 10     | 5   | 22063274         | 22221157       | 158       | 5                    |
| 11     | 5   | 36054328         | 36593177       | 539       | 13                   |
| 12     | 5   | 50458849         | 52048861       | 1590      | 5                    |
| 13     | 6   | 26140788         | 26220466       | 80        | 5                    |
| 14     | 6   | 28570859         | 28740314       | 169       | 6                    |
| 15     | 7   | 26777669         | 27014569       | 237       | 7                    |
| 16     | 8   | 15164327         | 15874082       | 710       | 23                   |
| 17     | 9   | 21512582         | 21543999       | 31        | 2                    |
| 18     | 10  | 14728444         | 14774628       | 46        | 3                    |
| 19     | 12  | 7744495          | 7799424        | 55        | 4                    |
| 20     | 14  | 5753769          | 5803989        | 50        | 4                    |
| 21     | 15  | 1737293          | 2020018        | 283       | 16                   |
| 22     | 17  | 9247986          | 9321117        | 73        | 3                    |
| 23     | 20  | 4048348          | 4069974        | 22        | 2                    |
| 24     | 20  | 6458146          | 6508290        | 50        | 5                    |
| 25     | 21  | 4766473          | 4871368        | 105       | 6                    |
| 26     | 21  | 5319394          | 5849715        | 530       | 25                   |
| 27     | 27  | 81812            | 128044         | 46        | 6                    |
| 28     | Z   | 63443182         | 64159026       | 716       | 14                   |
| 29     | Z   | 67845625         | 68188297       | 343       | 11                   |
| 30     | Z   | 71016792         | 71170715       | 154       | 4                    |

12 Abbreviations: Chr, chromosome; SNP, Single Nucleotide Polymorphism.

13

14 **Supplementary Material 4.** Chromosomal regions with evidence of selection and their size  
 15 by GBLUP in Line W1.

| Number | Chr | Start Region (b) | End Region (b) | Size (Kb) | # SNPs within Window |
|--------|-----|------------------|----------------|-----------|----------------------|
| 1      | 1   | 167395216        | 169276943      | 1882      | 17                   |
| 2      | 2   | 30519034         | 30760143       | 241       | 8                    |
| 3      | 2   | 41196442         | 41500199       | 304       | 6                    |
| 4      | 2   | 91379231         | 91630576       | 251       | 9                    |
| 5      | 3   | 70491928         | 70718748       | 227       | 10                   |
| 6      | 3   | 106157684        | 106493357      | 336       | 14                   |
| 7      | 4   | 41342661         | 44852911       | 3510      | 45                   |

|    |    |          |          |      |    |
|----|----|----------|----------|------|----|
| 8  | 6  | 22109324 | 22197788 | 88   | 4  |
| 9  | 7  | 13973139 | 14071039 | 98   | 3  |
| 10 | 8  | 27274382 | 27607198 | 333  | 6  |
| 11 | 14 | 1299671  | 2112686  | 813  | 20 |
| 12 | 14 | 7530640  | 7807504  | 277  | 8  |
| 13 | 15 | 897724   | 1308491  | 411  | 13 |
| 14 | 24 | 539599   | 959127   | 420  | 18 |
| 15 | 24 | 5055555  | 5141562  | 86   | 8  |
| 16 | Z  | 22188375 | 23226854 | 1038 | 15 |

16 Abbreviations: Chr, chromosome; SNP, Single Nucleotide Polymorphism.

17

18 **Supplementary Material 5.** Chromosomal regions with evidence of selection and their size  
19 by BLUP in Line B1.

| Number | Chr | Start Region (b) | End Region (b) | Size (Kb) | # SNPs within Window |
|--------|-----|------------------|----------------|-----------|----------------------|
| 1      | 5   | 5259614          | 5548921        | 289       | 6                    |
| 2      | 5   | 41614429         | 42813979       | 1200      | 11                   |
| 3      | 6   | 24613780         | 24734193       | 120       | 3                    |
| 4      | 7   | 6096647          | 6177766        | 81        | 6                    |
| 5      | 7   | 9781078          | 11908872       | 2128      | 9                    |
| 6      | 10  | 6230374          | 6652251        | 422       | 6                    |
| 7      | 21  | 6780205          | 6930673        | 150       | 15                   |
| 8      | Z   | 33473589         | 33832610       | 359       | 10                   |
| 9      | Z   | 40001342         | 41155850       | 1155      | 11                   |
| 10     | Z   | 52247377         | 52772760       | 525       | 11                   |

20 Abbreviations: Chr, chromosome; SNP, Single Nucleotide Polymorphism.

21

22 **Supplementary Material 6.** Chromosomal regions with evidence of selection and their size  
23 by BLUP in Line B2.

| Number | Chr | Start Region (b) | End Region (b) | Size (Kb) | # SNPs within Window |
|--------|-----|------------------|----------------|-----------|----------------------|
| 1      | 2   | 50530766         | 50893951       | 363       | 4                    |
| 2      | 3   | 36796454         | 37001278       | 205       | 6                    |
| 3      | 3   | 60672286         | 60784548       | 112       | 4                    |
| 4      | 4   | 71538605         | 71706644       | 168       | 4                    |
| 5      | 4   | 80768115         | 80890011       | 122       | 5                    |
| 6      | 6   | 36698845         | 37029368       | 331       | 12                   |
| 7      | 10  | 11684478         | 11742160       | 58        | 3                    |
| 8      | 12  | 18001140         | 18109181       | 108       | 6                    |
| 9      | 13  | 1291424          | 1533552        | 242       | 10                   |
| 10     | 19  | 5953716          | 5979279        | 26        | 2                    |
| 11     | Z   | 5909968          | 8728268        | 2818      | 43                   |
| 12     | Z   | 21650099         | 21704940       | 55        | 3                    |

24 Abbreviations: Chr, chromosome; SNP, Single Nucleotide Polymorphism.

25

26 **Supplementary Material 7.** Chromosomal regions with evidence of selection and their size  
27 by BLUP in Line W1.

| Number | Chr | Start Region (b) | End Region (b) | Size (Kb) | # SNPs within Window |
|--------|-----|------------------|----------------|-----------|----------------------|
| 1      | 1   | 161339470        | 161795934      | 456       | 5                    |
| 2      | 3   | 80155629         | 80821745       | 666       | 14                   |
| 3      | 4   | 45516115         | 46697542       | 1181      | 26                   |
| 4      | 4   | 55775170         | 55991394       | 216       | 5                    |
| 5      | 5   | 46490989         | 49086660       | 2596      | 52                   |
| 6      | 8   | 15134962         | 15266419       | 131       | 5                    |
| 7      | 9   | 23496401         | 23683979       | 188       | 3                    |
| 8      | 11  | 5445683          | 6203062        | 757       | 25                   |

|    |    |          |          |     |   |
|----|----|----------|----------|-----|---|
| 9  | 11 | 16558599 | 16927919 | 369 | 9 |
| 10 | 17 | 872685   | 995536   | 123 | 9 |
| 11 | 18 | 592250   | 633908   | 42  | 3 |
| 12 | 19 | 4807455  | 4840810  | 33  | 4 |
| 13 | 21 | 3887935  | 3982657  | 95  | 2 |

28 Abbreviations: Chr, chromosome; SNP, Single Nucleotide Polymorphism.

29

30 **Supplementary Material 8.** Initial allele frequency, selection coefficients, selection  
 31 intensities and additive effect for the alleles at peak of allele frequency changes in lines B1,  
 32 B2, and W1.

| Region Name: line(chr #)* | Initial minor allele frequency at peak ( $p_0$ ) | Selection coefficient ( $s$ ) | Selection intensity ( $i$ ) | Additive effect ( $a$ ) | Additive effect (standardized unit) | Variance explained (%) |
|---------------------------|--------------------------------------------------|-------------------------------|-----------------------------|-------------------------|-------------------------------------|------------------------|
| B1(3)                     | 0.302                                            | 0.757                         | 1.66                        | 50.5                    | 0.23                                | 2.19                   |
| B1(8)                     | 0.337                                            | 0.974                         | 1.66                        | 65                      | 0.29                                | 3.85                   |
| B1(12)                    | 0.567                                            | 0.820                         | 1.66                        | 54.7                    | 0.25                                | 3                      |
| B1(20)                    | 0.364                                            | 0.684                         | 1.66                        | 45.7                    | 0.21                                | 1.97                   |
| B1(21)                    | 0.467                                            | 0.877                         | 1.66                        | 58.5                    | 0.26                                | 3.48                   |
| B2(2)                     | 0.191                                            | 1.244                         | 1.70                        | 106.1                   | 0.37                                | 4.14                   |
| B2(3)                     | 0.131                                            | 0.791                         | 1.70                        | 67.5                    | 0.23                                | 1.23                   |
| B2(4)                     | 0.016                                            | 1.904                         | 1.70                        | 162                     | 0.56                                | 0.98                   |
| B2(8)                     | 0.059                                            | 1.700                         | 1.70                        | 145                     | 0.50                                | 2.78                   |
| B2(21)                    | 0.137                                            | 0.806                         | 1.70                        | 69                      | 0.24                                | 1.34                   |
| W1(2)                     | 0.369                                            | 0.909                         | 1.85                        | 61.1                    | 0.25                                | 2.81                   |
| W1(3)                     | 0.259                                            | 0.660                         | 1.85                        | 44.3                    | 0.18                                | 1.22                   |
| W1(4)                     | 0.332                                            | 0.872                         | 1.85                        | 58.6                    | 0.24                                | 2.46                   |
| W1(14)                    | 0.389                                            | 0.626                         | 1.85                        | 42.1                    | 0.17                                | 1.36                   |
| W1(Z)                     | 0.377                                            | 0.844                         | 1.85                        | 56.7                    | 0.23                                | 2.44                   |
| <b>Average</b>            | 0.29                                             | 0.96                          | 1.74                        | 72.4                    | 0.28                                | 2.3                    |

33 \* Additive effects were calculated for the 5 largest peaks of each line.

34

35 **Supplementary Material 9.** Selected regions overlapping with selected regions detected in  
 36 other studies.

| Number | Chr | Line | Selected regions detected by our study |                | Selected regions detected by other studies |                                     | Line type used in other studies                                                                      |
|--------|-----|------|----------------------------------------|----------------|--------------------------------------------|-------------------------------------|------------------------------------------------------------------------------------------------------|
|        |     |      | Start Region (b)                       | End Region (b) | Start Region (b)                           | End Region (b) <sup>Reference</sup> |                                                                                                      |
| 8      | 2   | B1   | 132208978                              | 136504544      | 132620000                                  | 132660000 <sup>b</sup>              | commercial white leghorn layer                                                                       |
| 9      | 2   | B1   | 146242439                              | 147240186      | 146980000                                  | 147020000 <sup>b</sup>              | domestic line                                                                                        |
| 10     | 5   | B1   | 33373065                               | 35793825       | 33752931                                   | 33833740 <sup>a</sup>               | broiler sire line                                                                                    |
|        |     |      |                                        |                | 34026477                                   | 34289307 <sup>a</sup>               | broiler sire line, broiler                                                                           |
|        |     |      |                                        |                | 34635714                                   | 34879253 <sup>a</sup>               | commercial, broiler, broiler sire line                                                               |
| 11     | 18  | B1   | 588543                                 | 679660         | 578906                                     | 615438 <sup>a</sup>                 | broiler, broiler sire line                                                                           |
| 1      | 1   | B2   | 152635633                              | 152738843      | 152516746                                  | 153003586 <sup>a</sup>              | domesticated line, commercial, broiler, layer, broiler sire line, broiler dam line, dutch new breeds |
|        |     |      |                                        |                | 152660000                                  | 152700000 <sup>b</sup>              | commercial white leghorn layer                                                                       |
| 2      | 2   | B2   | 118893774                              | 119623629      | 118647414                                  | 118747803 <sup>a</sup>              | commercial line,                                                                                     |

|    |    |           |           |           |           |                        |                                                                                                        |
|----|----|-----------|-----------|-----------|-----------|------------------------|--------------------------------------------------------------------------------------------------------|
|    |    |           |           |           |           |                        | broiler, layer                                                                                         |
|    |    |           |           |           | 119340000 | 119380000 <sup>b</sup> | domestic line                                                                                          |
| 3  | 2  | <b>B2</b> | 152274434 | 153504517 | 152674603 | 152903909 <sup>a</sup> | domesticated line,<br>commercial, non-<br>commercial, broiler,<br>broiler ire line, dutch<br>new breed |
|    |    |           |           |           | 152720000 | 152860000 <sup>b</sup> | commercial white<br>leghorn layer                                                                      |
|    |    |           |           |           | 152880000 | 152900000 <sup>b</sup> | commercial white<br>leghorn layer                                                                      |
| 4  | 3  | <b>B2</b> | 54888621  | 55308850  | 54910306  | 55009153 <sup>a</sup>  | chinese breed                                                                                          |
| 5  | 4  | <b>B2</b> | 21568436  | 22527061  | 22274031  | 22470419 <sup>a</sup>  | chinese breed                                                                                          |
| 6  | 5  | <b>B2</b> | 22063274  | 22221157  | 22085297  | 22155963 <sup>a</sup>  | broiler, broiler dam<br>line                                                                           |
| 7  | 7  | <b>B2</b> | 26777669  | 27014569  | 26760000  | 26820000 <sup>b</sup>  | commercial white<br>leghorn layer                                                                      |
| 12 | 1  | <b>W1</b> | 167395216 | 169276943 | 168540000 | 168580000 <sup>b</sup> | commercial white<br>leghorn layer                                                                      |
| 13 | 4  | <b>W1</b> | 41342661  | 44852911  | 43160000  | 43200000 <sup>b</sup>  | domestic line                                                                                          |
| 14 | 7  | <b>W1</b> | 13973139  | 14093954  | 13973139  | 14057861 <sup>a</sup>  | non-commercial,<br>dutch                                                                               |
| 15 | 14 | <b>W1</b> | 1281294   | 1876724   | 1500000   | 2000000 <sup>c</sup>   | commercial white<br>layer                                                                              |
| 16 | 15 | <b>W1</b> | 897724    | 1385483   | 1201531   | 1274715 <sup>a</sup>   | layer, dam broiler line                                                                                |

37 Abbreviations: Chr, chromosome.

38 <sup>a</sup>(Elferink *et al.*, 2012).

39 <sup>b</sup>(Rubin *et al.*, 2010).

40 <sup>c</sup>(Amaral, 2010).

41

## 42 **Supplementary notes**

### 43 **Calculation of selection coefficient (s) and selection intensity (i)**

44 Selection coefficient (s) was calculated using the following formula as:

$$45 \quad s = -\ln \frac{\left( \left( \frac{1}{p_t} - 1 \right) / \left( \frac{1-p_0}{p_0} \right) \right)}{t} \quad (1)$$

46 The above formula was derived from the general formula for the change in gene frequency

47 due to selection at an additive gene which is:  $\Delta p = sp(1-p)$ . With the assumption that the

48 allele frequency is a continuous process in time, changes in allele frequency can be written as:

49  $dp/dt = sp(1-p)$  (Goddard, 2009). The integrated form of this formula becomes

50  $p_t = p_0 e^{st} / (1 - p_0 + p_0 e^{st})$ , where  $p_0$  is the starting allele frequency at the peak,  $t$  is the

51 number of generations of selection,  $p_t$  is the allele frequency after  $t$  generations of selection.

52 Finally, the selection coefficient against the unfavourable homozygote for a given SNP was  
53 estimated from the formula (1).

54 Selection intensities ( $i$ ) were retrieved from proportion of selection candidates selected ( $p$ )  
55 using the tables on pp. 379-380 in Falconer and Mackay (Falconer and Mackay, 1996).  $p$  was  
56 calculated separately for males and females by dividing the number of selected parents by the  
57 total number of selection candidates in each generation of GBLUP and BLUP. Since the  
58 number of males and females selected in each generation were not equal,  $i$  was different for  
59 males and females (Table 1 and Table 3).

60

#### 61 **Calculation of effective population size ( $N_e$ )**

62  $N_e$  was estimated as: 
$$N_e = \frac{p_0 * (1 - p_0)}{2 * \text{var}(d_{02})}$$

63 , where  $p_0$  and  $1 - p_0$  were the allele frequencies from gene dropping,  $\text{var}(d_{02})$  was the  
64 variance of allele frequency difference from gene dropping.

65

#### 66 **Calculation of Fst**

67 Fst was calculated as: 
$$Fst = \frac{H_t - H_s}{H_t}$$

68 ,where  $H_s = ((2 * p_i * (1 - p_i)) + (2 * p_j * (1 - p_j))) / 2$  and  $H_t = 2 * p_{ij} * (1 - p_{ij})$ .

69  $p_{ij} = (p_i + p_j) / 2$ .

70 , where  $p_i$  was the allele frequency in line  $i$ ,  $p_j$  was the allele frequency in line  $j$ ,  $p_{ij}$  was  
71 the average between the allele frequencies of the two lines.  $H_s$  was the mean expected  
72 heterozygosity between lines, and  $H_t$  was the total heterozygosity in total population.
